1 Repeat Testing of Mpox Specimens with Late CTs Improves Detection of Potential False

2 Positive Cases

3

4 Ryan C. Shean<sup>1,2</sup>, Weston C. Hymas<sup>2</sup>, Jeremy Klein<sup>2</sup>, Michael Pyne<sup>2</sup>, David R. Hillyard<sup>1,2</sup>,

5 Benjamin T. Bradley<sup>1,2,#</sup>

6

7 <sup>1</sup>Department of Pathology, University of Utah, Salt Lake City UT, USA

8 <sup>2</sup>ARUP Laboratories, Salt Lake City, UT, USA

9

10 #Address correspondence to Ben T. Bradley, [Ben.Bradley@hsc.utah.edu](mailto:Ben.Bradley@hsc.utah.edu)

11 Running Title: MPXV repeat testing improves false positive detection

12 Keywords: Monkeypox virus, mpox, MPXV, false positive, PCR

13 **Abstract**

14 The global outbreak of mpox necessitated the rapid development of clinical assays for  
15 monkeypox virus detection. While the majority of mpox specimens have high viral loads with  
16 corresponding early CT values, reports have indicated some specimens with late CT values can  
17 represent false positive results. To mitigate this risk, the Centers for Disease Control and  
18 Prevention (CDC) published an advisory recommending repeat testing of all specimens with CT  
19 values  $\geq 34$ . However, limited experimental data was available to support this specific cutoff. In  
20 this study, we examine whether a more conservative approach in which all specimens with CT  
21 values  $\geq 29$  are repeated would improve the detection of potential false positive results.  
22 Compared to the CDC algorithm, our approach identified an additional 20% (5/25) of potential  
23 false positive results. To assess the impact of this cutoff on laboratory workload, we estimated  
24 the expected increase in test volume and turnaround time (TAT) relative to the CDC method.  
25 Using a lower repeat threshold, test volume increased by 0.7% and the mean TAT for positive  
26 specimens increased by less than 15 minutes. Overall, a lower threshold than recommended by  
27 the CDC for repeating late CT mpox specimens may reduce the number of false positives  
28 reported while minimally impacting testing volume and TAT.

29

## 30 Introduction

31 Monkeypox virus (MPXV) is a double stranded DNA virus in the *Orthopoxvirus* genus,  
32 which also includes variola virus, the causative agent of smallpox. In July 2022 the World Health  
33 Organization declared a Public Health Emergency of International Concern due to an outbreak of  
34 MPXV with sustained human-to-human transmission in multiple non-endemic countries<sup>1</sup>. At the  
35 beginning of the outbreak, testing capacity in the United States was limited to the Centers for  
36 Disease Control and Prevention (CDC) and members of the Laboratory Response Network. In  
37 June 2022, clinical laboratories, using the assay developed by the CDC, began adding additional  
38 testing capacity<sup>2</sup>. This was followed over the subsequent weeks by other clinical microbiology  
39 laboratories that either adapted the CDC assay or validated their own laboratory developed test in  
40 accordance with recommendations from the FDA<sup>3</sup>. Additionally, several manufacturers received  
41 emergency use authorization (EUA) for orthopoxvirus or MPXV-specific assays following the  
42 EUA declaration on September 17<sup>th</sup>, 2022.

43 The majority of specimens collected from individuals with mpox have demonstrated high  
44 viral loads with corresponding early CT values<sup>4</sup>. However, shortly after the outbreak began,  
45 reports of false positive mpox cases began to surface. In a series of three false positive cases, all  
46 specimens had late CT values ranging from 34.3 to 36.7<sup>5</sup>. In September 2022, the CDC  
47 published an advisory recommending repeat testing of all specimens with CT values  $\geq 34$ <sup>6</sup>. Due  
48 to the limited data surrounding the utility of this cutoff, our institution adopted a more  
49 conservative strategy of repeating all positive specimens with a CT  $\geq 29$  from 9/15/22 to 11/4/22.  
50 Here we present a retrospective analysis of this data to better understand the clinical and  
51 laboratory impact of a more stringent repeat threshold.

52

## 53 **Materials and Methods**

### 54 *MPXV PCR testing*

55           Detection of monkeypox virus at ARUP was performed as previously described<sup>4</sup>. In  
56 brief, specimens received as dry swabs were resuspended in PBS prior to further processing.  
57 DNA from VTM and dry swabs was extracted and amplified on the Roche cobas 6800 platform.  
58 Roche omni channel reagents with lab-developed primers and probes were used for detection of  
59 a conserved region of the polymerase gene present in non-variola orthopoxviruses<sup>7</sup>.

60

### 61 *Data extraction and labeling*

62           Data for individual specimens were extracted from the Laboratory Information System  
63 (LIS) at the end of the study period. All tests with a completed time logged in the LIS between  
64 00:00 on 9/15/22 and 23:59 on 11/4/22 were included. Information gathered for each specimen  
65 included a unique deidentified specimen ID, unique deidentified patient ID, age and sex of  
66 patient, initial CT value (CT1), CT value of repeated test if performed (CT2), swab type (Dry,  
67 VTM, or Other), collection site, collection time, in-lab time, and completion time. Samples were  
68 retrospectively classified based on their CT1 value as “detected” or “not detected”. “Detected”  
69 specimens were samples with CT1 <50. “Not detected” specimens were samples with CT1 = 50  
70 (value provided by the instrument when no amplification curve is detected). “Detected”  
71 specimens were further sub-categorized as “positive”, “low positive”, or “indeterminate” based  
72 on CT1 and CT2 results. “Positive” specimens were samples with CT1 <29. “Low positive”  
73 specimens were samples with CT1 values between  $\geq 29$  and <50 and CT2 values <50.  
74 “Indeterminate” specimens also had CT1 values between  $\geq 29$  and <50 but with a CT2 value =  
75 50. Nine specimens had their CT2 values excluded because the CT1 values were <29. These

76 samples were repeated due to run control failures or when collected from pediatric patients (all  
77 pediatric specimens were repeated regardless of CT value). The impact of repeat testing on  
78 pediatric specimens was previously examined<sup>8</sup>. 21 specimens with a CT1  $\geq$ 29 failed to undergo  
79 repeat testing due to low specimen volume. These were classified as “detected” and excluded  
80 from sub-categorization.

81

### 82 *Ethics, data analysis, and statistics*

83 University of Utah granted an IRB exemption ID#00158025. Deidentified data was  
84 processed in Python 3.8 and detailed statistical analysis was performed in R v4.2<sup>9</sup>.

85

## 86 **Results**

### 87 *Descriptive epidemiology of MPXV PCR testing*

88 A total of 4,233 specimens were analyzed over the 51-day study period with an average  
89 of 88.2 tests per day (Fig. 1). During this period, MPXV was initially detected in 18.7%  
90 (790/4,233) of specimens. Of the 790 specimens in which MPXV was detected 23.3% (184/790)  
91 had a CT1 at or above the repeat threshold of CT 29 and were repeated. Of the 184 tests that  
92 were repeated 86.4% (159/184) produced a valid CT2 signal and were classified as “low  
93 positive”. 13.6% (25/184) of these specimens failed to repeat and were classified as  
94 “indeterminate”. Total testing volume decreased by an average of 1.8 tests/day over the study  
95 period, however, detection rate and rate of low positives remained relatively stable.

96 Specimens were collected from 3,111 individuals over the study period (Table 1). The  
97 average age of tested individuals was 34.4 years (SD 17.0) and 68.2% of patients were male.  
98 Overall, there was a significant association between categorical result and sex (Pearson’s Chi-

99 squared test  $p < 0.05$ ). In cross-group comparisons, male individuals comprised a smaller  
100 proportion of negative results (62.7%) than either positive (93.0%) or low positive (92.8%)  
101 results (pairwise Bonferroni corrected Pearson's chi-squared tests  $p < 0.008$ ). There was no  
102 significant association between age of patient and result.

103

#### 104 *A Lower Repeat Threshold Improves Specificity of MPXV Detection*

105 For samples with MPXV detected, the mean CT1 value was 20.5 (SD 4.0) for positives,  
106 34.3 (SD 3.1) for low positives, and 37.6 (SD 3.6) for indeterminate samples. The average CT2  
107 for low positives was 33.9 (SD 3.3). Per our algorithm, repeat testing was not performed for  
108 positive samples and CT2 values for indeterminate specimens were set at 50 (i.e. no valid curve).  
109 There was good correlation between the CT1 and CT2 of low positive specimens with an r-  
110 squared of 0.8 and standard error of 0.03 (Figure 2). During the study period a total of 184  
111 specimens were repeated according to our algorithm. While the majority of specimens (86.4%,  
112 159/184) detected MPXV upon repeat testing, 13.6% (25/184) of samples failed to repeat and  
113 were subsequently categorized as indeterminate. CT1 values for indeterminate specimens ranged  
114 from 29.5 to 44.2. (Figure 3). While 80% (20/25) of these samples were at or above the CDC's  
115 recommended repeat threshold of 34, there were five specimens (CT1 values 29.5, 30.8, 31.1,  
116 32.4, 33.3) below this cutoff. Compared to this study's repeat algorithm, the CDC's algorithm  
117 had a sensitivity of 100% (95% CI: 97.7% – 100%) and a specificity of 80% (95% CI: 59.3% –  
118 93.17%) for MPXV detection in specimens with CT1 values  $\geq 29$ .

119

#### 120 *A Lower Repeat Threshold Minimally Impacts Test Volume and Turn-around Times*

121 As repeat testing could lead to unsustainable testing volume or prolonged turn-around  
122 times (TAT), we examined changes in testing volume and TAT associated with repeat thresholds  
123 of 29 or 34 as compared to a no-repeat baseline. Sub-analyses were performed assuming a mpox  
124 prevalence of 3%, 10%, 18% (the average overall detection rate during our study period), and  
125 30%. The increase in testing volume ranged from 0.6% to 6.0% and 0.5% to 4.8% for a repeat  
126 threshold of 29 or 34, respectively (Figure 4A). During the study period, using a lower repeat  
127 threshold of 29 led to an additional 1.4 tests per day as compared to the CDC's recommendation.

128 TAT was assessed based on the time from specimen receipt to final result (i.e. in-lab TAT)  
129 due to variations in specimen shipping practices. Overall, the mean in-lab TAT for positive  
130 specimens increased by 0.15 to 1.82 hours depending on the prevalence of mpox and repeat  
131 threshold employed. When comparing TAT between repeat thresholds, using a CT of 29 versus  
132 34 for repeat testing prolonged the mean in-lab TAT of positive specimens by less than 30  
133 minutes (Figure 4B). On a per specimen basis, the average in-lab TAT was 33.1 hours (SD 16.2)  
134 for all samples, 31.9h (SD 14.2) for positives, 31.7h (SD 14.7) for negatives, 61.8h (SD 21.4) for  
135 low positives and 63.6h (SD 25.7) for indeterminate samples. Repeating a specimen added an  
136 average of 31.7h (SD 29.1) to the in-lab TAT. However, time to receipt remained the largest  
137 contributor to overall TAT at 72.8h (SD 43.0) (Figure 5).

138

## 139 **Discussion**

140 Here we assess over 4,000 MPXV PCR results from a large reference laboratory to  
141 examine the impact of repeating late CT specimens on patient results. We found that a reflex CT  
142 of 29 as compared to 34 potentially reduces the number of false positive results reported. We also

143 demonstrate that regardless of the repeat threshold selected, there is minimal impact to testing  
144 volume and TAT.

145 False positive results may be due to a number of pre-analytic factors including  
146 mislabeling, sampling error, or contamination of collection devices and reagents<sup>10,11</sup>. There are  
147 also a variety of analytic errors that can occur such as pipetting error and specimen cross-  
148 contamination<sup>12</sup>. From the perspective of a clinical microbiology laboratory, closed tube systems  
149 and a reduction in the number of technicians handling the specimen can lower contamination  
150 rates; however, no system is perfect<sup>13</sup>. Specific challenges to preventing cross-contamination  
151 during the mpox epidemic included the high prevalence of positive samples (18% during the  
152 study period) and the relatively high level of MPXV DNA within positive specimens (mean CT  
153 of 20.5 for positive specimens). These problems are not unique to MPXV and may be seen in  
154 other viruses with extremely high viral loads, such as BK virus. False positive results have  
155 previously been shown with PCR assays for BK virus, including on the instrument used in this  
156 study<sup>14</sup>

157 A central question to this study is whether the specimens we categorized as indeterminate  
158 (i.e. those which failed to repeat) represent a false positive result or are an artifact of stochastic  
159 effect near the assay's limit of detection (LOD). When validating our assay, we established the  
160 97.5% (39/40 repeats) LOD at 80 copies per reaction which corresponded to an average CT of  
161 39.5 (SD 1.03, 95% CI 37.8 – 41.6). Thus, we are reasonably confident that specimens at or  
162 below this CT value should consistently repeat as detected. In this study, 72% (18/25) of  
163 indeterminate specimens had a CT value less than our LOD of 39.5. Therefore, we believe the  
164 majority of indeterminate results, and in particular those identified only by the lower cutoff,  
165 represent false positive results.



166 Despite the CDC's recommendation, there has been little uniformity in the adoption of  
167 MPXV repeat cutoffs. Of the 6 MPXV assays granted emergency use authorization, only one  
168 outlines a repeat strategy<sup>15</sup>. For this specific assay, the repeat threshold is set between a CT of 38  
169 and 40 with the assay's LOD determined to be at a CT of 36.0 (100 copies/mL). Selecting a  
170 repeat threshold above an assay's LOD provides limited clinical utility as specimens which fail  
171 to repeat have a higher likelihood of representing the stochastic effect of low DNA  
172 concentrations. We selected a repeat threshold 10 cycles lower than the established LOD to more  
173 confidently identify cases which fail to repeat as false positives.

174 This study is unique in that it analyzes mpox specimens collected from sites across the  
175 US and includes a relatively large cohort. During the study period, we reported approximately  
176 13% of the total number of mpox tests registered by the CDC<sup>16</sup>. However, these results may not  
177 translate uniformly to other laboratories. Labs with a lower throughput who have not automated  
178 this process or use a different instrument may experience different sources of error which could  
179 impact the likelihood of false positives. Limitations of this study include its retrospective and  
180 descriptive nature, use of data from a single reference laboratory, and limited clinical data to  
181 adjudicate indeterminate specimens.

182 While the initial surge of mpox cases has abated, the question of whether this virus will  
183 endemically circulate in humans remains<sup>17,18</sup>. Currently, data from the CDC and our institution  
184 show a positivity rate of approximately 10%, arguing that laboratories will continue to face  
185 testing challenges related to specimens with late CT values. As these results may have significant  
186 social and psychological impact, reducing false positive mpox results is critical<sup>19,20</sup>. The CDC's  
187 recommendations provide a suitable starting point for laboratories performing mpox testing;

188 however, each laboratory should carefully inspect the performance of its assay to determine the  
189 optimal repeat thresholds.

190

191 **References**

- 192 (1) WHO Director-General's statement at the press conference following IHR Emergency  
193 Committee regarding the multi-country outbreak of monkeypox - 23 July 2022.  
194 [https://www.who.int/director-general/speeches/detail/who-director-general-s-statement-on-](https://www.who.int/director-general/speeches/detail/who-director-general-s-statement-on-the-press-conference-following-IHR-emergency-committee-regarding-the-multi-country-outbreak-of-monkeypox--23-july-2022)  
195 [the-press-conference-following-IHR-emergency-committee-regarding-the-multi--country-](https://www.who.int/director-general/speeches/detail/who-director-general-s-statement-on-the-press-conference-following-IHR-emergency-committee-regarding-the-multi-country-outbreak-of-monkeypox--23-july-2022)  
196 [outbreak-of-monkeypox--23-july-2022](https://www.who.int/director-general/speeches/detail/who-director-general-s-statement-on-the-press-conference-following-IHR-emergency-committee-regarding-the-multi-country-outbreak-of-monkeypox--23-july-2022) (accessed 2023-06-19).
- 197 (2) Affairs (ASPA), A. S. for P. HHS Expanding Monkeypox Testing Capacity to Five  
198 Commercial Laboratory Companies. HHS.gov.  
199 [https://www.hhs.gov/about/news/2022/06/22/hhs-expanding-monkeypox-testing-capacity-](https://www.hhs.gov/about/news/2022/06/22/hhs-expanding-monkeypox-testing-capacity-five-commercial-laboratory-companies.html)  
200 [five-commercial-laboratory-companies.html](https://www.hhs.gov/about/news/2022/06/22/hhs-expanding-monkeypox-testing-capacity-five-commercial-laboratory-companies.html) (accessed 2023-06-19).
- 201 (3) Health, C. for D. and R. Monkeypox (mpox) and Medical Devices. FDA.  
202 [https://www.fda.gov/medical-devices/emergency-situations-medical-devices/monkeypox-](https://www.fda.gov/medical-devices/emergency-situations-medical-devices/monkeypox-mpox-and-medical-devices)  
203 [mpox-and-medical-devices](https://www.fda.gov/medical-devices/emergency-situations-medical-devices/monkeypox-mpox-and-medical-devices) (accessed 2023-09-08).
- 204 (4) Lieberman, N. A. P.; Mathias, P. C.; Bradley, B. T.; Greninger, A. L. Clinical Performance  
205 and Trends during the First Two Months of Monkeypox Virus PCR Testing at Two United  
206 States Reference Labs. *J. Clin. Microbiol.* **2022**, 60 (12), e01371-22.  
207 <https://doi.org/10.1128/jcm.01371-22>.
- 208 (5) Minhaj, F. S.; Petras, J. K.; Brown, J. A.; Mangla, A. T.; Russo, K.; Willut, C.; Lee, M.;  
209 Beverley, J.; Harold, R.; Milroy, L.; Pope, B.; Gould, E.; Beeler, C.; Schneider, J.; Mostafa,  
210 H. H.; Godfred-Cato, S.; Click, E. S.; Borah, B. F.; Galang, R. R.; Cash-Goldwasser, S.;  
211 Wong, J. M.; McCormick, D. W.; Yu, P. A.; Shelus, V.; Carpenter, A.; Schatzman, S.; Lowe,  
212 D.; Townsend, M. B.; Davidson, W.; Wynn, N. T.; Satheshkumar, P. S.; O'Connor, S. M.;  
213 O'Laughlin, K.; Rao, A. K.; McCollum, A. M.; Negrón, M. E.; Hutson, C. L.; Salzer, J. S.;

- 214 CDC Monkeypox Emergency Response Team; CDC Monkeypox Emergency Response  
215 Team. Orthopoxvirus Testing Challenges for Persons in Populations at Low Risk or Without  
216 Known Epidemiologic Link to Monkeypox - United States, 2022. *MMWR Morb. Mortal.*  
217 *Wkly. Rep.* **2022**, 71 (36), 1155–1158. <https://doi.org/10.15585/mmwr.mm7136e1>.
- 218 (6) 08/23/2022: Lab Advisory: Mpox Virus Testing Considerations to Prevent False Positive  
219 Test Results. [https://www.cdc.gov/locs/2022/08-23-2022-Lab-Advisory-](https://www.cdc.gov/locs/2022/08-23-2022-Lab-Advisory-Monkeypox_Virus_Testing_Considerations_Prevent_False_Positive_Test_Results.html)  
220 [Monkeypox\\_Virus\\_Testing\\_Considerations\\_Prevent\\_False\\_Positive\\_Test\\_Results.html](https://www.cdc.gov/locs/2022/08-23-2022-Lab-Advisory-Monkeypox_Virus_Testing_Considerations_Prevent_False_Positive_Test_Results.html)  
221 (accessed 2023-06-18).
- 222 (7) Li, Y.; Olson, V. A.; Laue, T.; Laker, M. T.; Damon, I. K. Detection of Monkeypox Virus  
223 with Real-Time PCR Assays. *J. Clin. Virol. Off. Publ. Pan Am. Soc. Clin. Virol.* **2006**, 36  
224 (3), 194–203. <https://doi.org/10.1016/j.jcv.2006.03.012>.
- 225 (8) Ma, A.; Bradley, B. T. Clinical Testing of Pediatric Mpox Specimens: Unique Features and  
226 Challenges in a Low Prevalence Population. *J. Clin. Virol. Off. Publ. Pan Am. Soc. Clin.*  
227 *Virol.* **2023**, 163, 105447. <https://doi.org/10.1016/j.jcv.2023.105447>.
- 228 (9) R Core Team. R: A Language and Environment for Statistical Computing; R Foundation for  
229 Statistical Computing: Vienna, Austria, 2023.
- 230 (10) Najat, D. Prevalence of Pre-Analytical Errors in Clinical Chemistry Diagnostic Labs in  
231 Sulaimani City of Iraqi Kurdistan. *PLOS ONE* **2017**, 12 (1), e0170211.  
232 <https://doi.org/10.1371/journal.pone.0170211>.
- 233 (11) Sotoudeh Anvari, M.; Gharib, A.; Abolhasani, M.; Azari-Yam, A.; Hossieni Gharalari, F.;  
234 Safavi, M.; Zare Mirzaie, A.; Vasei, M. Pre-Analytical Practices in the Molecular  
235 Diagnostic Tests, A Concise Review. *Iran. J. Pathol.* **2021**, 16 (1), 1–19.  
236 <https://doi.org/10.30699/ijp.2020.124315.2357>.

- 237 (12) Taylor, S. C.; Nadeau, K.; Abbasi, M.; Lachance, C.; Nguyen, M.; Fenrich, J. The Ultimate  
238 qPCR Experiment: Producing Publication Quality, Reproducible Data the First Time.  
239 Trends Biotechnol. **2019**, 37 (7), 761–774. <https://doi.org/10.1016/j.tibtech.2018.12.002>.
- 240 (13) Rahbari, R.; Moradi, N.; Abdi, M. rRT-PCR for SARS-CoV-2: Analytical Considerations.  
241 Clin. Chim. Acta Int. J. Clin. Chem. **2021**, 516, 1–7.  
242 <https://doi.org/10.1016/j.cca.2021.01.011>.
- 243 (14) Fritzsche, A.; Berneking, L.; Nörz, D.; Reucher, S.; Fischer, N.; Roggenkamp, H.;  
244 Aepfelbacher, M.; Rohde, H.; Pfefferle, S.; Lütgehetmann, M. Clinical Evaluation of a  
245 Laboratory-Developed Quantitative BK Virus-PCR Assay Using the Cobas® Omni Utility  
246 Channel. J. Virol. Methods **2021**, 290, 114093.  
247 <https://doi.org/10.1016/j.jviromet.2021.114093>.
- 248 (15) Health, C. for D. and R. Monkeypox (mpox) Emergency Use Authorizations for Medical  
249 Devices. FDA. [https://www.fda.gov/medical-devices/emergency-use-authorizations-](https://www.fda.gov/medical-devices/emergency-use-authorizations-medical-devices/monkeypox-mpox-emergency-use-authorizations-medical-devices)  
250 [medical-devices/monkeypox-mpox-emergency-use-authorizations-medical-devices](https://www.fda.gov/medical-devices/emergency-use-authorizations-medical-devices/monkeypox-mpox-emergency-use-authorizations-medical-devices)  
251 (accessed 2023-09-19).
- 252 (16) Non-Variola Orthopoxvirus and Mpox Virus Laboratory Testing Data | Mpox | Poxvirus |  
253 CDC. [https://www-cdc-gov.ezproxy.lib.utah.edu/poxvirus/mpox/response/2022/2022-lab-](https://www-cdc-gov.ezproxy.lib.utah.edu/poxvirus/mpox/response/2022/2022-lab-test.html)  
254 [test.html](https://www-cdc-gov.ezproxy.lib.utah.edu/poxvirus/mpox/response/2022/2022-lab-test.html) (accessed 2023-09-08).
- 255 (17) Reardon, S. What Does the Future Look like for Monkeypox? Nature **2022**, 610 (7931),  
256 250–252. <https://doi.org/10.1038/d41586-022-03204-7>.
- 257 (18) Mega, E. R. Why Scientists Fear Monkeypox Spreading in Wild Animals. Nature **2022**.  
258 <https://doi.org/10.1038/d41586-022-03048-1>.

- 259 (19) Happi, C.; Adetifa, I.; Mbala, P.; Njouom, R.; Nakoune, E.; Happi, A.; Ndodo, N.;
- 260 Ayansola, O.; Mboowa, G.; Bedford, T.; Neher, R. A.; Roemer, C.; Hodcroft, E.; Tegally,
- 261 H.; O’Toole, Á.; Rambaut, A.; Pybus, O.; Kraemer, M. U. G.; Wilkinson, E.; Isidro, J.;
- 262 Borges, V.; Pinto, M.; Gomes, J. P.; Freitas, L.; Resende, P. C.; Lee, R. T. C.; Maurer-Stroh,
- 263 S.; Baxter, C.; Lessells, R.; Ogwell, A. E.; Kebede, Y.; Tessema, S. K.; de Oliveira, T.
- 264 Urgent Need for a Non-Discriminatory and Non-Stigmatizing Nomenclature for
- 265 Monkeypox Virus. *PLoS Biol.* **2022**, 20 (8), e3001769.
- 266 <https://doi.org/10.1371/journal.pbio.3001769>.
- 267 (20) Turpin, R. E.; Mandell, C.; Camp, A. D.; Davidson Mhonde, R. R.; Dyer, T. V.; Mayer, K.
- 268 H.; Liu, H.; Coates, T.; Boekeloo, B. O. Monkeypox-Related Stigma and Vaccine
- 269 Challenges as a Barrier to HIV Pre-Exposure Prophylaxis among Black Sexual Minority
- 270 Men. *Int. J. Environ. Res. Public. Health* **2023**, 20 (14), 6324.
- 271 <https://doi.org/10.3390/ijerph20146324>.
- 272
- 273

274 **Table 1** – Patient characteristics by MPXV detection result

| <b>Result</b> | <b>Patients (n, %)</b> | <b>Mean Age (y, SD)</b> | <b>Gender</b>                         |
|---------------|------------------------|-------------------------|---------------------------------------|
| Positive      | 446 (14.3%)            | 35.5 (10.3)             | 93.0% M<br>7.0% F<br>0.0% U           |
| Low Positive  | 98 (3.15%)             | 32.9 (11.9)             | 92.9% M<br>6.1% F<br>1.0% U           |
| Indeterminate | 16 (0.51%)             | 33.9 (11.7)             | 75.0% M<br>25.0% F<br>0.0% U          |
| Negative      | 2542 (81.7%)           | 34.3 (18.1)             | 62.7% M<br>37.1% F<br>0.2% U          |
| <b>Total</b>  | <b>3111 (100%)</b>     | <b>34.4 (17.0)</b>      | <b>68.2% M<br/>31.6% F<br/>0.2% U</b> |

275

276

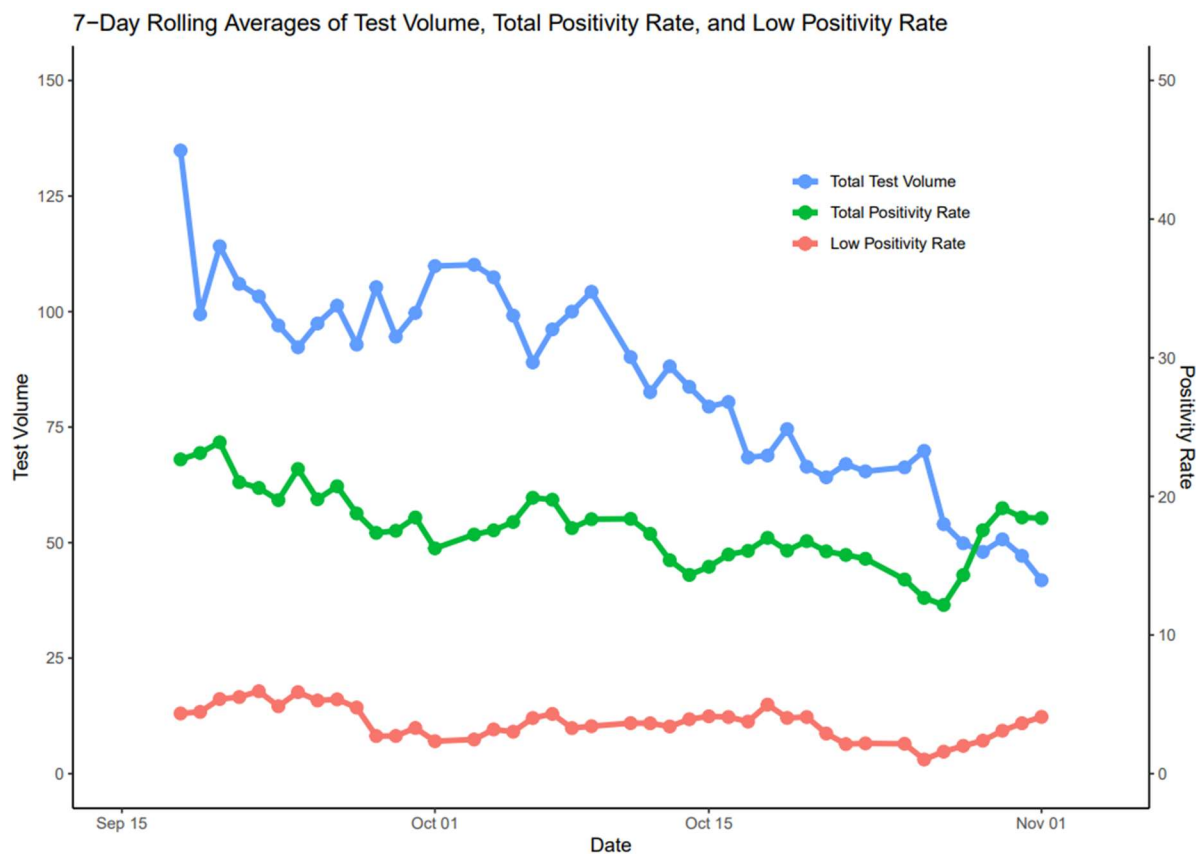

277  
278 **Figure 1 – 7-Day Rolling Averages of Test Volume, Total Positivity Rate, and Low Positivity**  
279 **Rate**

280 Total test volume is represented by the blue line and measured in tests per day on the left Y-axis.  
281 Percent of total tests with MPXV detected (CT1 <50) and percent of specimens falling within the  
282 repeat threshold (CT1  $\geq$ 29 and <50) are indicated by the green and red lines, respectively.  
283 Positivity rates are measured relative to the total test volume and mapped to the right Y-axis.  
284



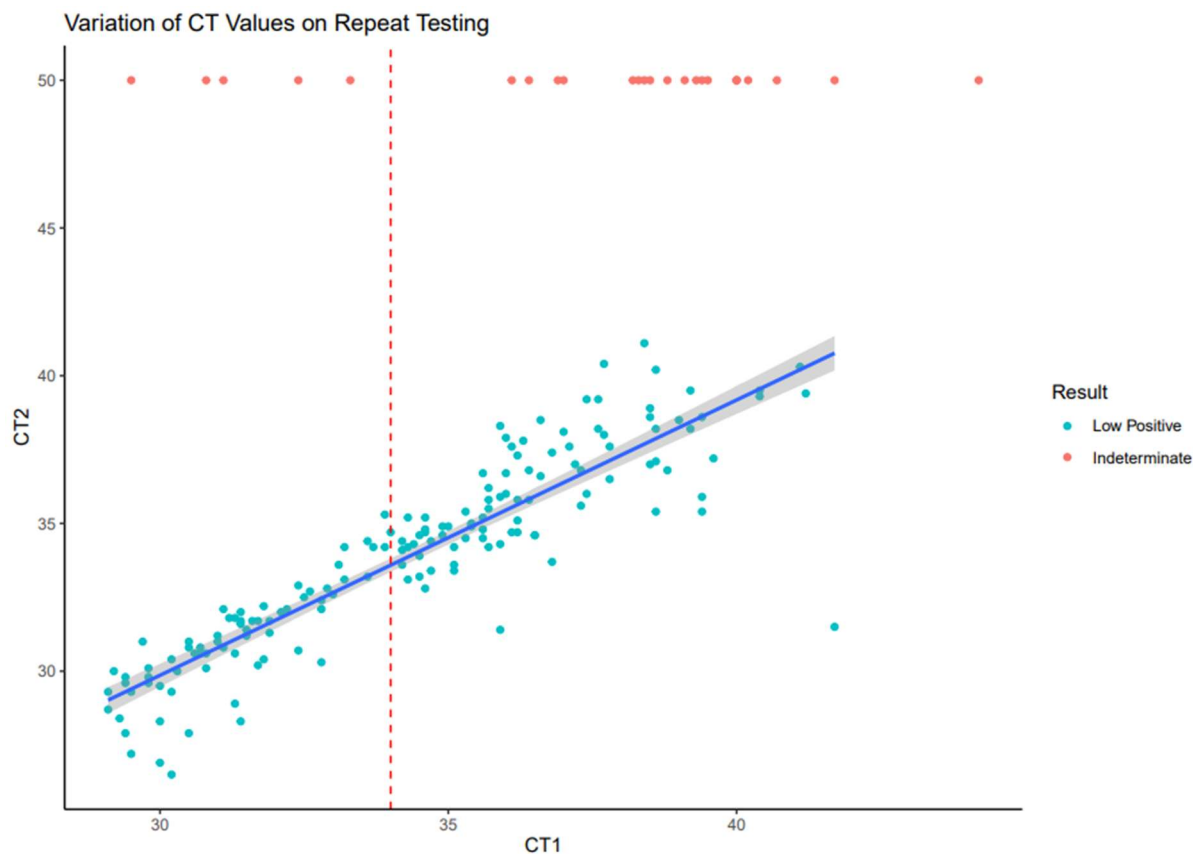

285  
286 **Figure 2 – Variation of CT Values on Repeat Testing**  
287 Comparison of CT values for initial (CT1) vs. repeated (CT2) tests during the study period,  
288 including both low positive results (CT1  $\geq 29$  to  $< 50$ ; CT2  $< 50$ ) and indeterminate results (CT1  
289  $\geq 29$  to  $< 50$ ; CT2 = 50). The CDC’s recommended repeat threshold (CT  $\geq 34$ ) is represented by  
290 red dotted line. Linear best fit line and 95% confidence interval for low positive results are  
291 represented by the blue line and gray shading. R-squared value for low-positive only results was  
292 0.8. The r-squared value decreased to 0.43 when indeterminate results were included.  
293

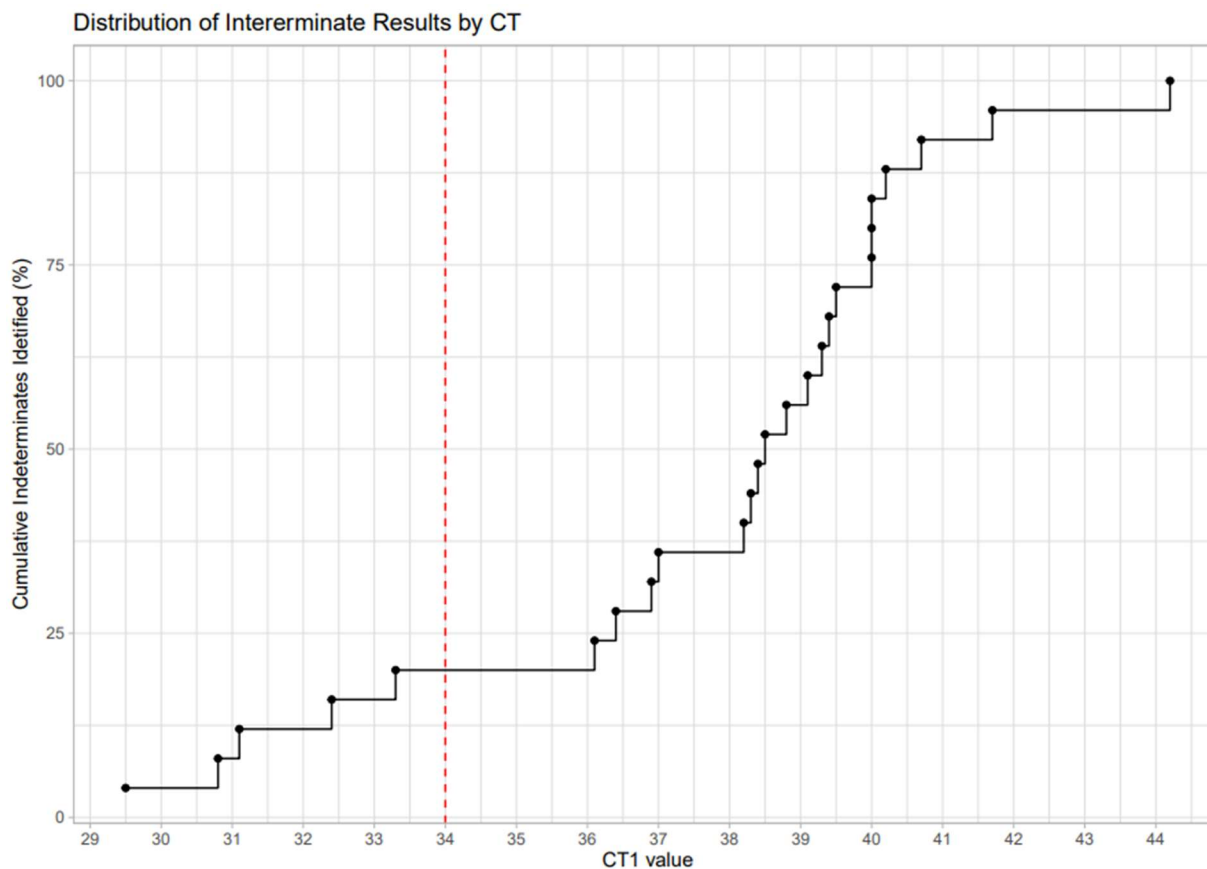

294

295 **Figure 3 – Distribution of Indeterminate Results by CT1**

296 Cumulative percentage of indeterminate results in our study distributed by CT1 value. Each point  
297 represents one indeterminate result. Red dotted line represents the CDC’s recommended repeat  
298 testing cutoff (CT  $\geq 34$ ).

299

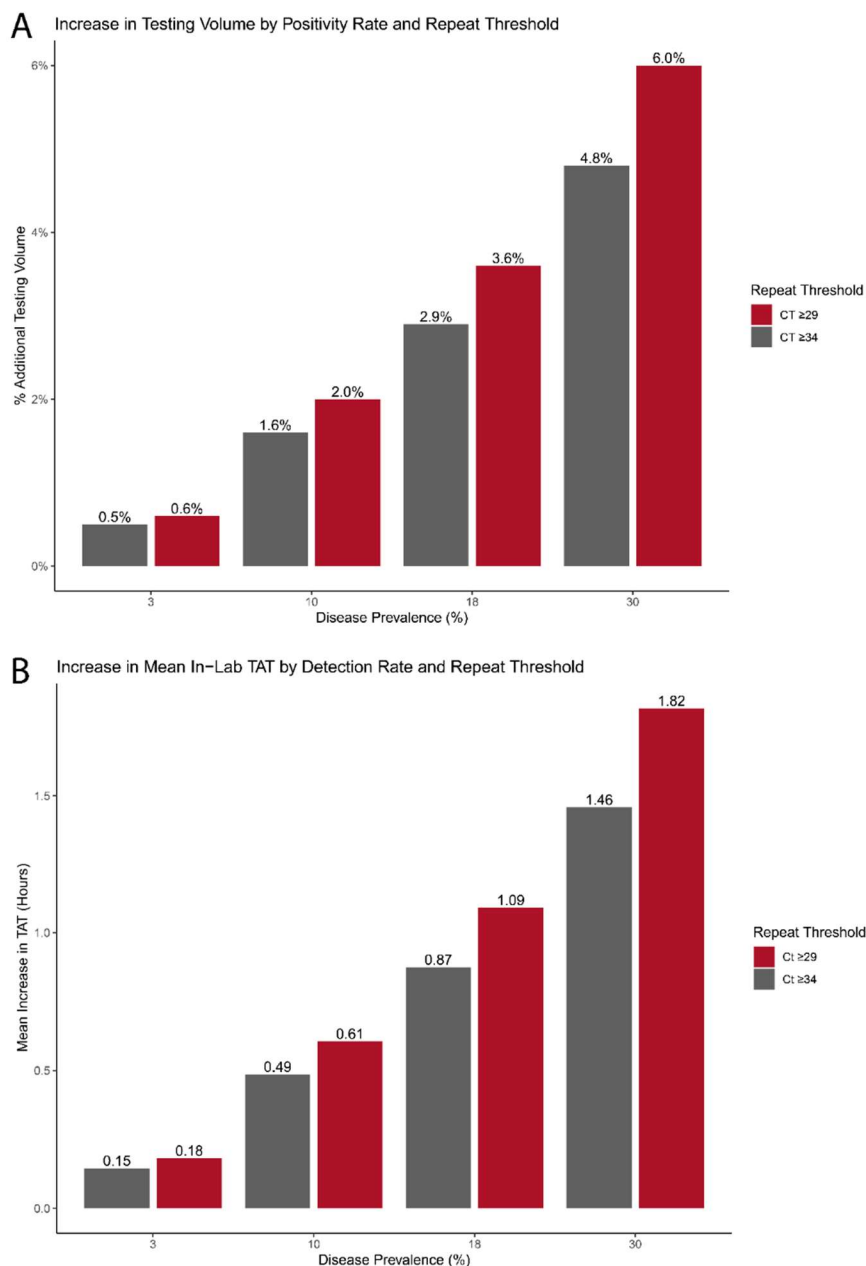

300

301 **Figure 4 - Impact of Repeat Thresholds on Overall Test Volume and In-lab TAT.**

302 A) Comparison of repeat thresholds on overall test volume based on different levels of mpox  
303 prevalence in the test population. Y-axis represent relative increase in volume versus a no-repeat  
304 approach. B) Comparison of repeat thresholds on mean in-lab TAT for specimens with MPXV  
305 detected based on prevalence. Y-axis represents the mean increase of in-lab TAT in hours versus  
306 a no-repeat approach.

307

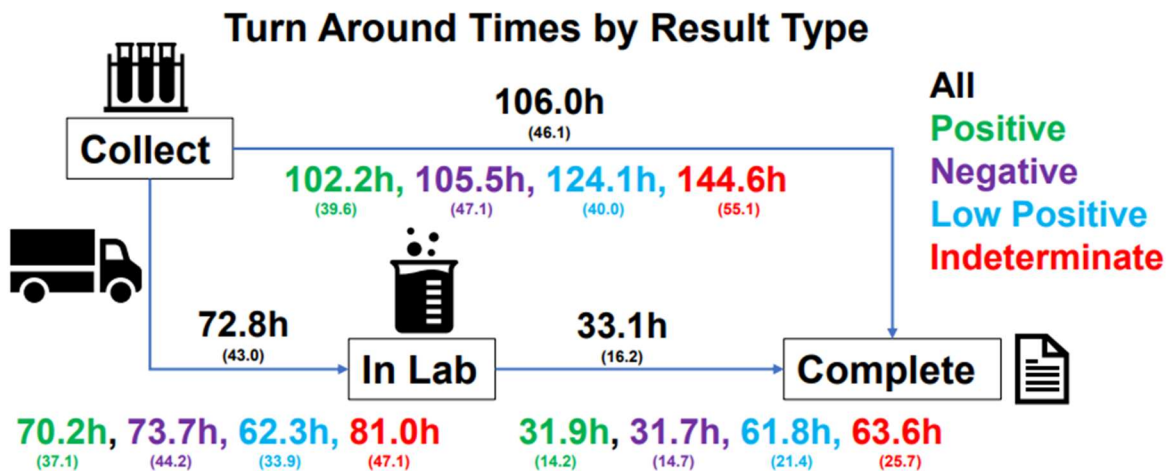

308

309 **Figure 5 – Turn Around Time by Final Result**

310 Breakdown of turn-around time by final assigned result. All times are in hours. Total time  
 311 between collection and completion shown on top arrow. Values are provided as mean with  
 312 standard deviation in parenthesis.

313
